# Supplementary material for: LXR/CD38 activation drives cholesterol-induced macrophage senescence and neurodegeneration via NAD+ depletion
Source: PubMed Central journal article supplement — Cell Rep. Author manuscript; Available in PMC 2024 Jul 4. (PMC11223747; doi:10.1016/j.celrep.2024.114102), 2024-04-17
Supplement: NIHMS2000438-supplement-1.pdf [file NIHMS2000438-supplement-1.pdf]

**Cell Reports, Volume 43**

**Supplemental information**

**LXR/CD38 activation drives cholesterol-induced  
macrophage senescence and neurodegeneration  
via NAD<sup>+</sup> depletion**

**Ryo Terao, Tae Jun Lee, Jason Colasanti, Charles W. Pfeifer, Joseph B. Lin, Andrea Santeford, Keitaro Hase, Shinobu Yamaguchi, Daniel Du, Brian S. Sohn, Yo Sasaki, Mitsukuni Yoshida, and Rajendra S. Apte**

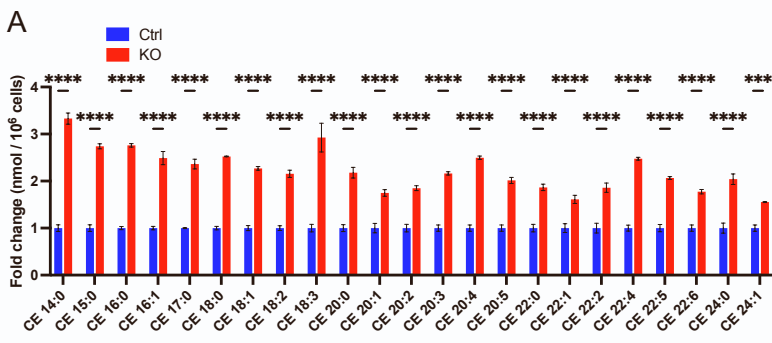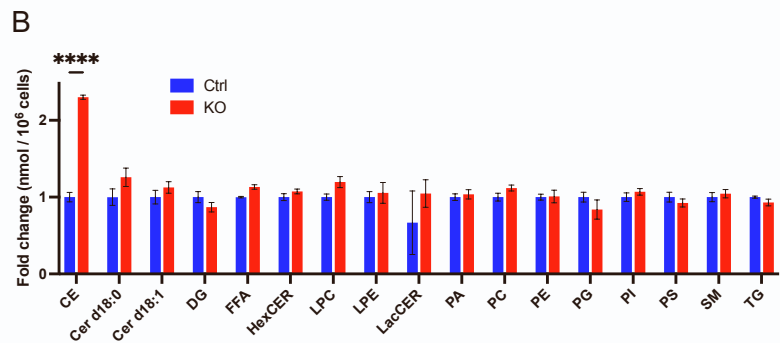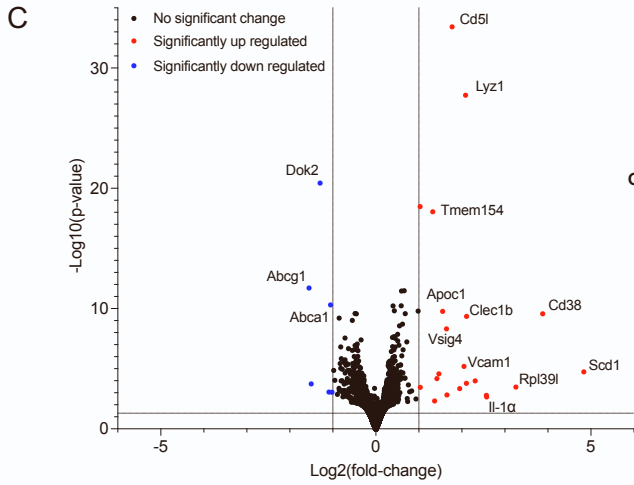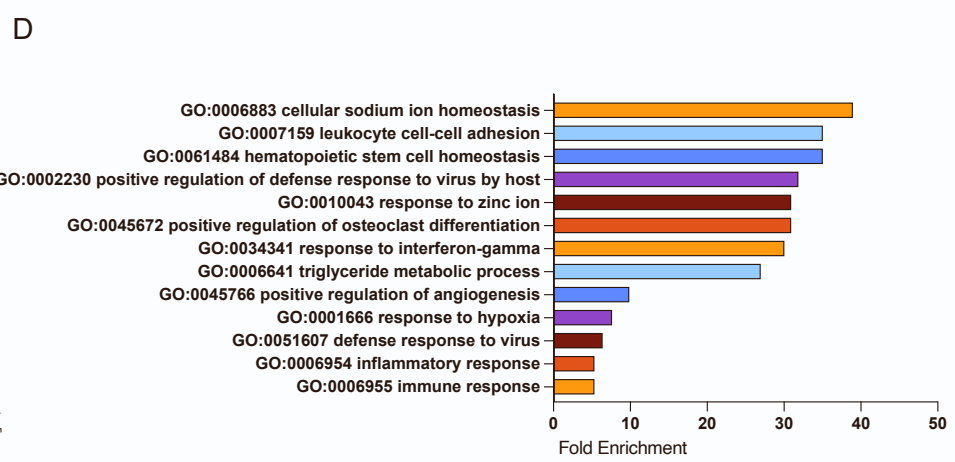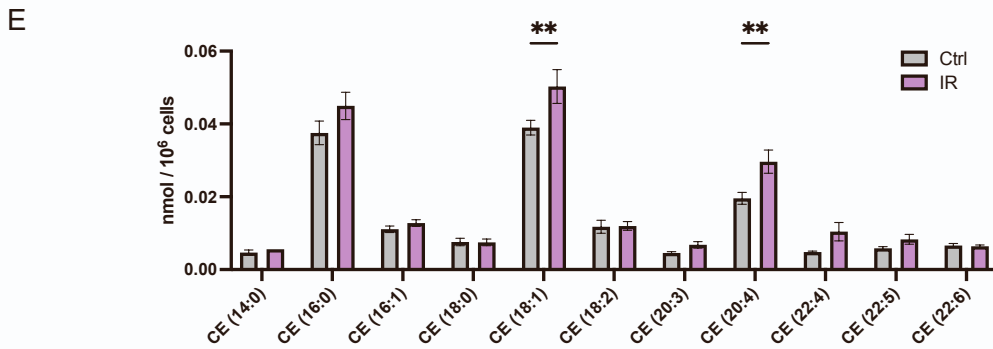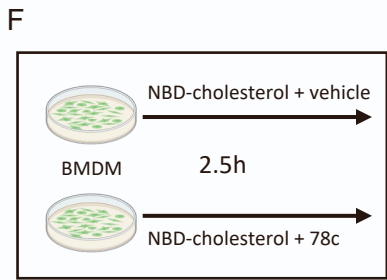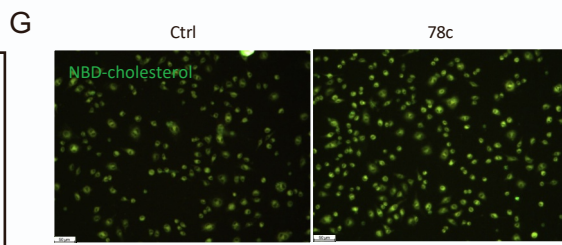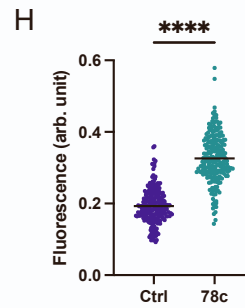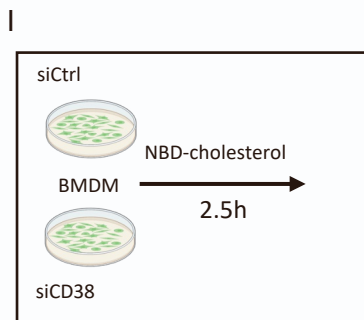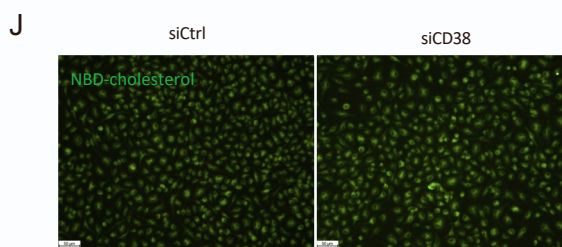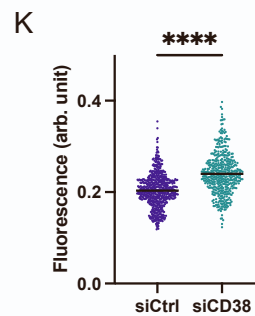

Figure S1. Lipid profiles and bulk RNA sequence of macrophages with *Abca1* and *Abcg1* deficiency and the effect of CD38 inhibition on cholesterol accumulation in macrophages, related to Figure 1

(A) Intracellular cholesterol ester (CE) species in *Abca1/g1<sup>-m/-m</sup>* (KO) and *Abca1/g1<sup>ff/ff</sup>* (Ctrl) BMDMs. (B) Quantitative profiles of lipid classes in KO and Ctrl BMDMs. (C) The volcano plot of genes generated using a  $\log_2$  -fold change and corrected  $p$  values between KO and Ctrl BMDMs. Cutoff of  $-\log_{10}(p \text{ value})$  and  $\log_2(\text{fold-change})$  are set to 1.3 and  $\pm 1.0$ , respectively. (D) Gene set enrichment analysis of *Abca1/g1<sup>-m/-m</sup>* BMDMs compared with *Abca1/g1<sup>ff/ff</sup>* BMDMs. (E) Intracellular CE species in BMDMs treated with irradiation (IR). (F) Experimental design of NBD-cholesterol flux assay using 78c (G) Representative images of BMDMs treated with NBD-cholesterol under the presence of 78c or vehicle (DMSO). (H) The quantification of fluorescence intensity of each cell. (I) Experimental design of NBD-cholesterol flux assay using siRNA knockdown of *CD38* (siCD38). (J) Representative images of BMDMs transfected with siCtrl or siCD38 and treated with NBD-cholesterol. (K) The quantification of fluorescence intensity of each cell. Cer, ceramide; DG, diglycerides; FFA, free fatty acids; HexCER, Hexosylceramides; LPC, lysophosphatidylcholines; LPE, lysophosphatidylethanolamine; LacCER, lactosylceramide; PA, phosphatidic acid; PC, phosphatidylcholines; PE, phosphatidylethanolamine; PG, phosphatidylglycerol; PI, phosphatidylinositol; PS, phosphatidylserine; SM, sphingomyelin; TG, triglyceride. \*\*\* $p < 0.001$ ; \*\*\*\* $p < 0.0001$ , two-way ANOVA followed by Bonferroni correction for comparison. Data are represented as mean  $\pm$  SEM. The length of scale bar is indicated in each image.

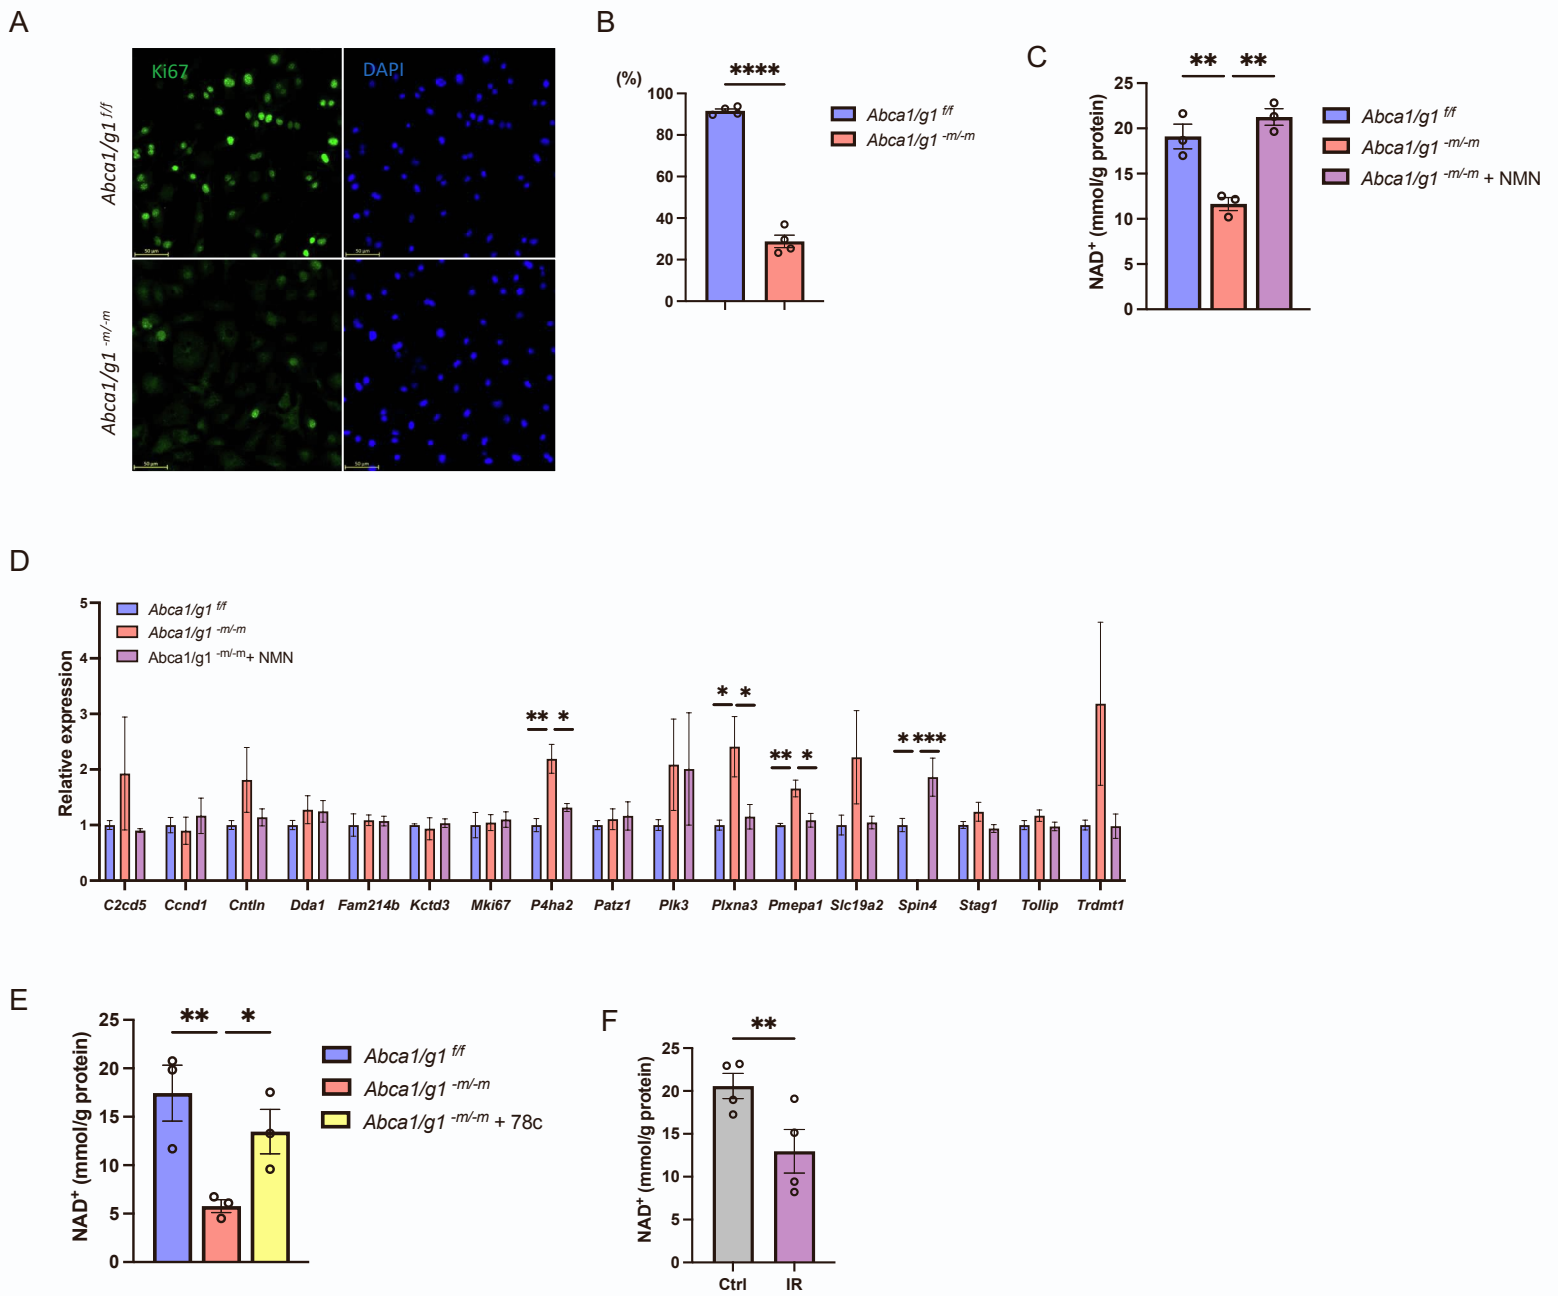

Figure S2. Senescence profiles of macrophages with *Abca1* and *Abcg1* deficiency, related to Figure 2

(A) Immunofluorescence of Ki67 of BMDMs isolated from *Abca1/g1<sup>fl/fl</sup>* and *Abca1/g1<sup>-m/-m</sup>* mice. (B) The quantification of Ki67-positive cells. (C) NAD<sup>+</sup> concentration of *Abca1/g1<sup>-m/-m</sup>* BMDMs treated with NMN. (D) Senescence panel assay to evaluate senescence markers in *Abca1/g1<sup>fl/fl</sup>*, *Abca1/g1<sup>-m/-m</sup>*, and *Abca1/g1<sup>-m/-m</sup>* BMDMs treated with NMN. (E) NAD<sup>+</sup> concentration of *Abca1/g1<sup>-m/-m</sup>* BMDMs treated with the CD38 inhibitor. (F) NAD<sup>+</sup> concentration of BMDMs treated with irradiation (IR). \**p* < 0.05; \*\**p* < 0.01; \*\*\**p* < 0.001; \*\*\*\**p* < 0.0001, t-test for comparison between 2 groups, one-way ANOVA followed by Bonferroni correction for comparison. Data are represented as mean ± SEM. The length of scale bar is indicated in each image.

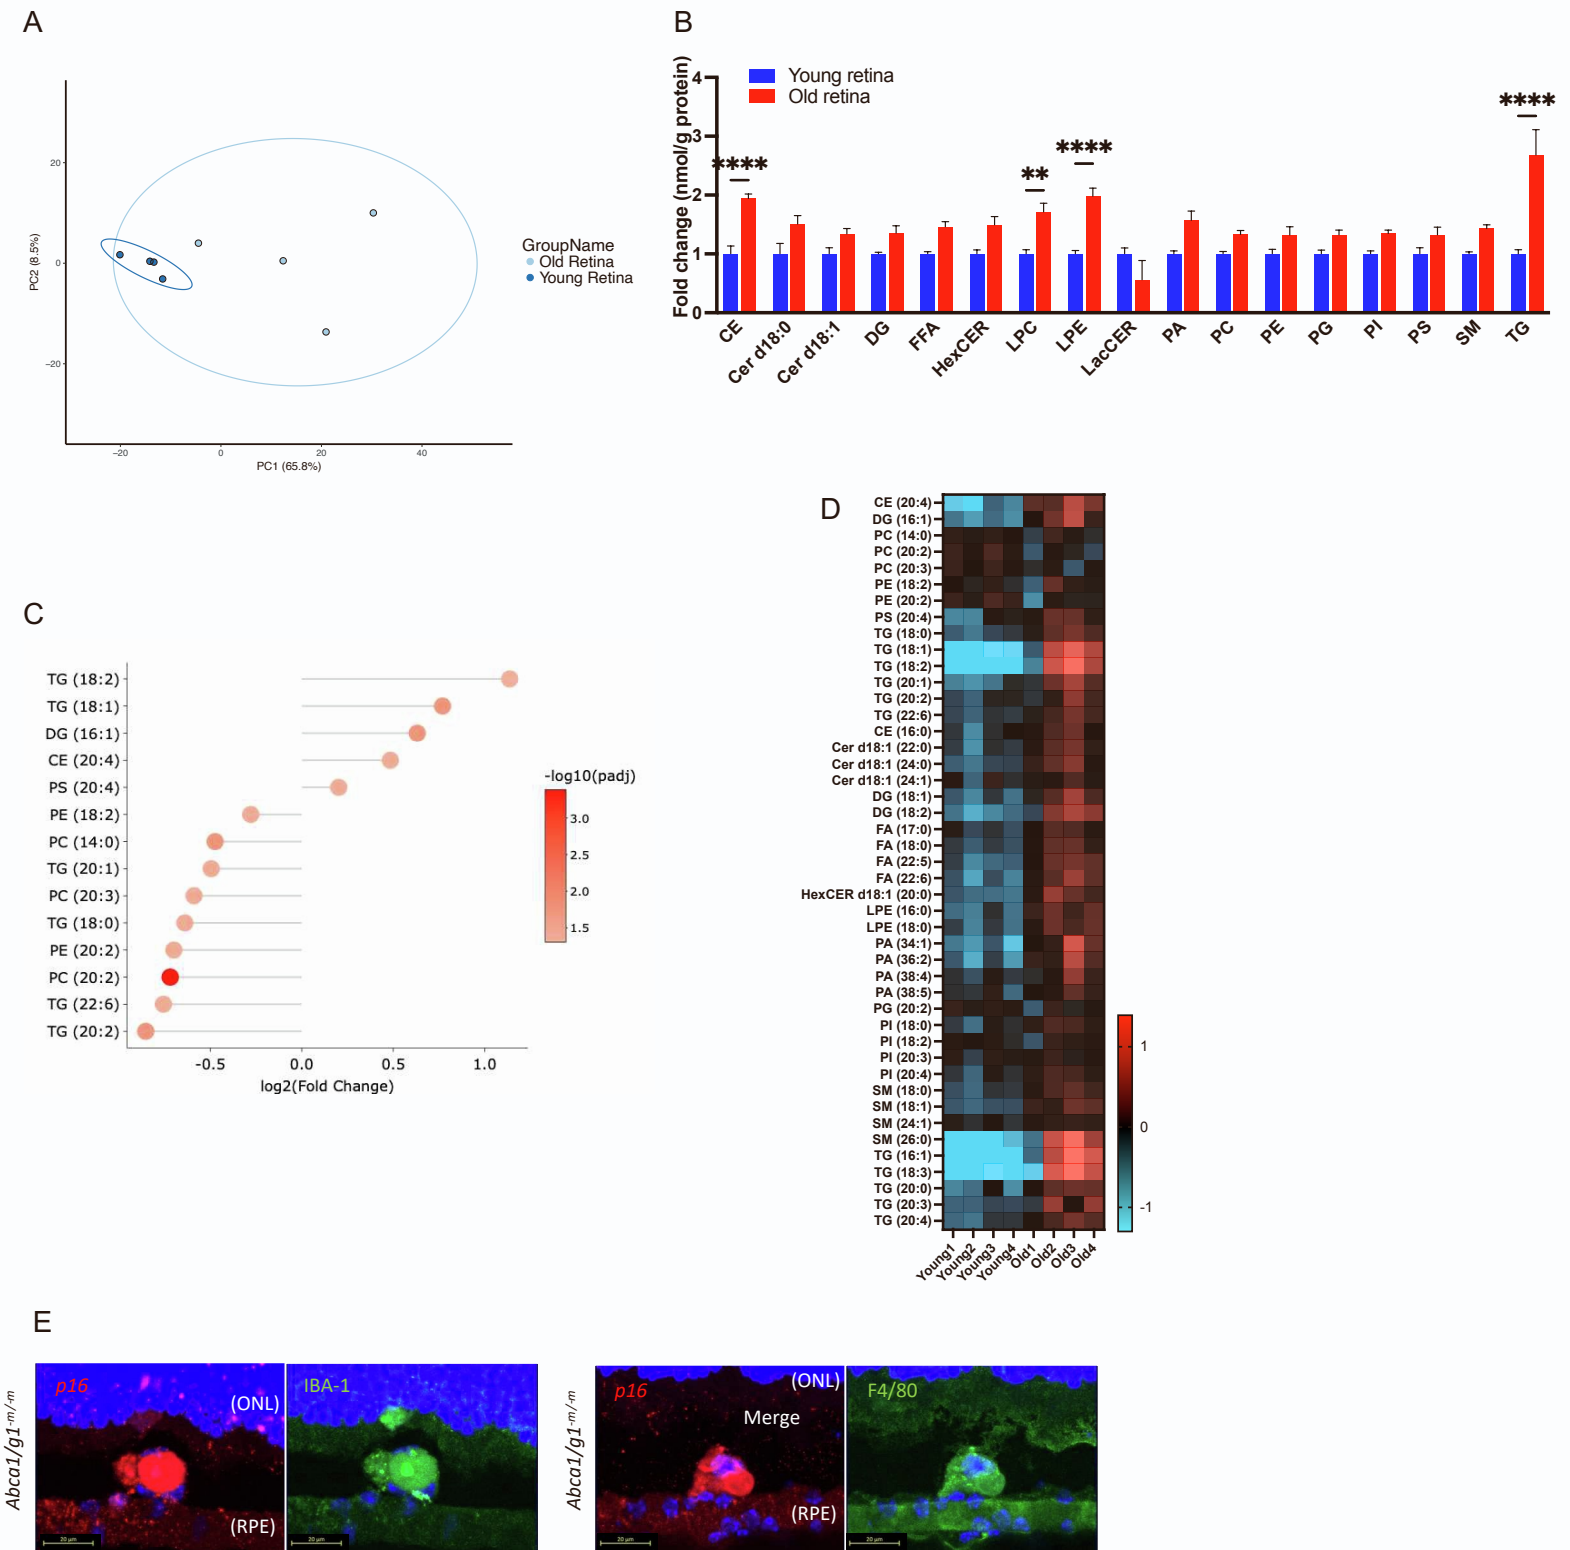

Figure S3. Lipid profiles of retina isolated from young and old mice, related to Figure 3

(A) Principal component analyses (PCA) analysis of the lipidomics data in young (2 months old) and old (27 months old) retina quantified by LC/MS. (B) Quantitative profiles of lipid classes in young and old retina. (C) The lollipop chart of lipid species with significance analysed by LipidSig. (D) The heatmap increased lipids in lipidomics measurement. (E) Co-staining images of ISH (*p16*) and immunofluorescence (F4/80 and IBA-1) in retinal sections. ONL, outer nuclear layer; RPE, retinal pigment epithelium. Cer, ceramide; DG, diglycerides; FFA, free fatty acids; HexCER, Hexosylceramides; LPC, lysophosphatidylcholines; LPE, lysophosphatidylethanolamine; LacCER, lactosylceramide; PA, phosphatidic acid; PC, phosphatidylcholines; PE, phosphatidylethanolamine; PG, phosphatidylglycerol; PI, phosphatidylinositol; PS, phosphatidylserine; SM, sphingomyelin; TG, triglyceride. \*\* $p < 0.01$ ; \*\*\*\* $p < 0.0001$ , two-way ANOVA followed by Bonferroni correction for comparison. Data are represented as mean  $\pm$  SEM. The length of scale bar is indicated in each image.

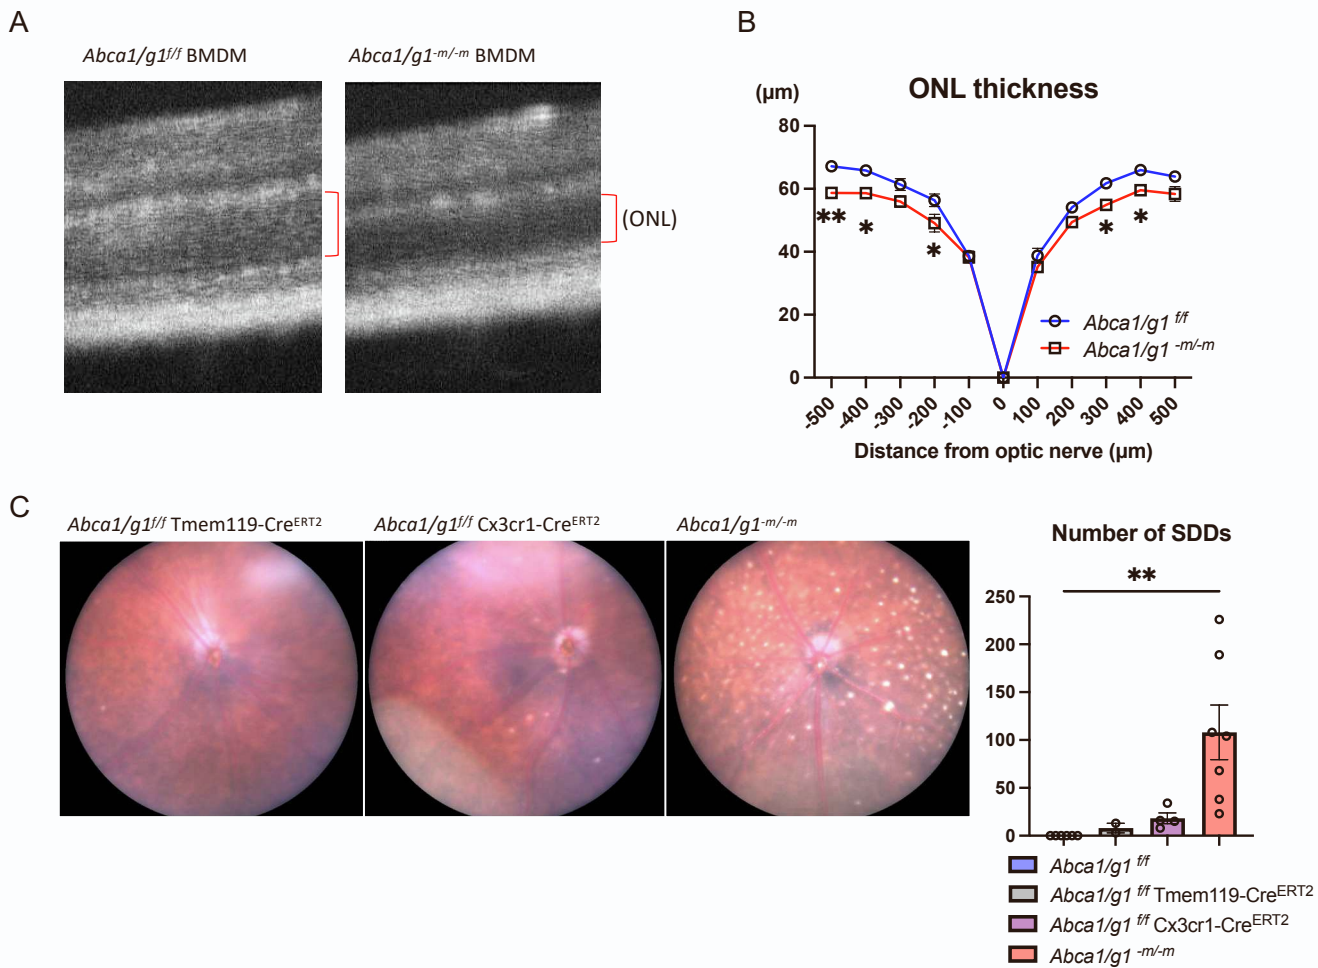

Figure S4. Subretinal senescent macrophages induce photoreceptor degeneration, related to Figure 4

(A) Representative optical coherence tomography images of wild-type mice treated with subretinal injection of BMDMs isolated from *Abca1/g1<sup>fl/fl</sup>* and *Abca1/g1<sup>-m/-m</sup>* mice. Brackets indicate outer nuclear layer (ONL), which contains photoreceptor nuclei. (B) Quantification of ONL thickness in retina treated with subretinal BMDM injection. ONL thickness was measured at points every 100 $\mu\text{m}$  from optic nerve. (C) Representative fundus images of *Abca1/g1<sup>fl/fl</sup>* Tmem119-Cre<sup>ERT2</sup>, *Abca1/g1<sup>fl/fl</sup>* Cx3cr1-Cre<sup>ERT2</sup>, and *Abca1/g1<sup>-m/-m</sup>* mice. Images of mice expressing Cre<sup>ERT2</sup> were taken 3 months after tamoxifen-infused chow feeding for 3 weeks. \* $p < 0.05$ ; \*\* $p < 0.01$ ; \*\*\* $p < 0.001$ ; \*\*\*\* $p < 0.0001$ , two-way ANOVA followed by Bonferroni correction for comparison. Data are represented as mean  $\pm$  SEM.

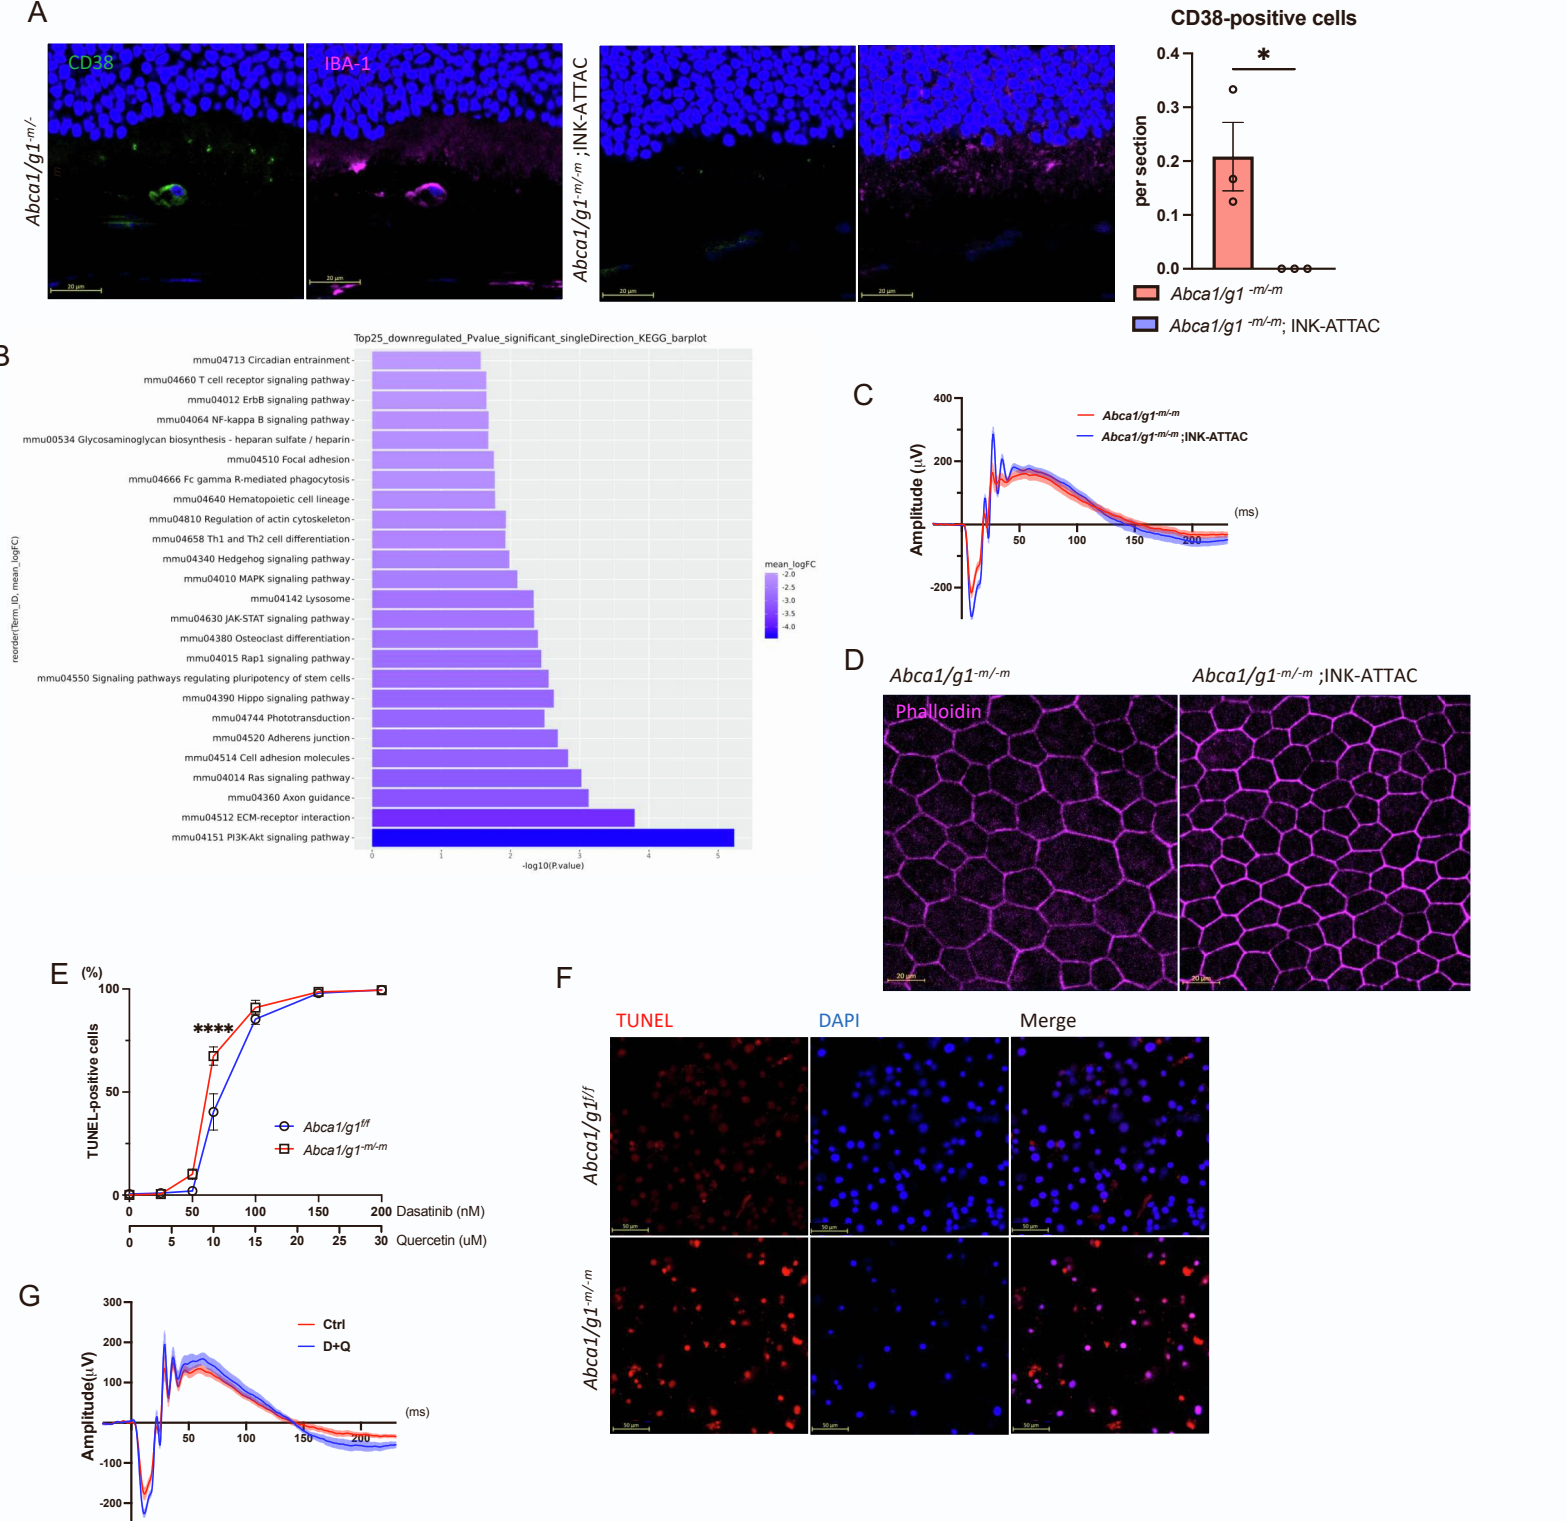

Figure S5. Effects of genetic and pharmacological senolysis on cellular signaling pathway in RPE/choroid complex and retinal function, related to Figure 5

(A) Immunofluorescence of CD38 and IBA-1 in retinal sections of *Abca1/g1<sup>-m/m</sup>* and *Abca1/g1<sup>-m/m</sup>; INK-ATTAC* and the quantification of CD38-positive cells. (B) KEGG pathway analysis of genes comparing RPE/choroid complex samples isolated from *Abca1/g1<sup>-m/m</sup>* and *Abca1/g1<sup>-m/m</sup>; INK-ATTAC*. (C) ERG wave of *Abca1/g1<sup>-m/m</sup>* and *Abca1/g1<sup>-m/m</sup>; INK-ATTAC*. Each waveform indicates the mean  $\pm$  SEM. (D) Representative immunofluorescence images of RPE-flatmount isolated from *Abca1/g1<sup>-m/m</sup>* and *Abca1/g1<sup>-m/m</sup>; INK-ATTAC* stained for phalloidin. Note the smaller number of RPE cells indicating cell loss in *Abca1/g1<sup>-m/m</sup>*. (E) The proportion of TUNEL-positive cells in *Abca1/g1<sup>ff</sup>* and *Abca1/g1<sup>-m/m</sup>* BMDMs treated with dasatinib and quercetin *in vitro*. (F) Representative TUNEL staining of *Abca1/g1<sup>ff</sup>* and *Abca1/g1<sup>-m/m</sup>* BMDMs treated with dasatinib (66.7nM) and quercetin (10uM). (G) ERG wave of *Abca1/g1<sup>-m/m</sup>* treated with D+Q or vehicle (Ctrl). Each waveform indicates the mean  $\pm$  SEM. \* $p < 0.05$ ; \*\*\*\* $p < 0.0001$ , t-test for comparison between 2 groups, two-way ANOVA followed by Bonferroni correction for comparison with multiple time points. Data are represented as mean  $\pm$  SEM. The length of scale bar is indicated in each image.

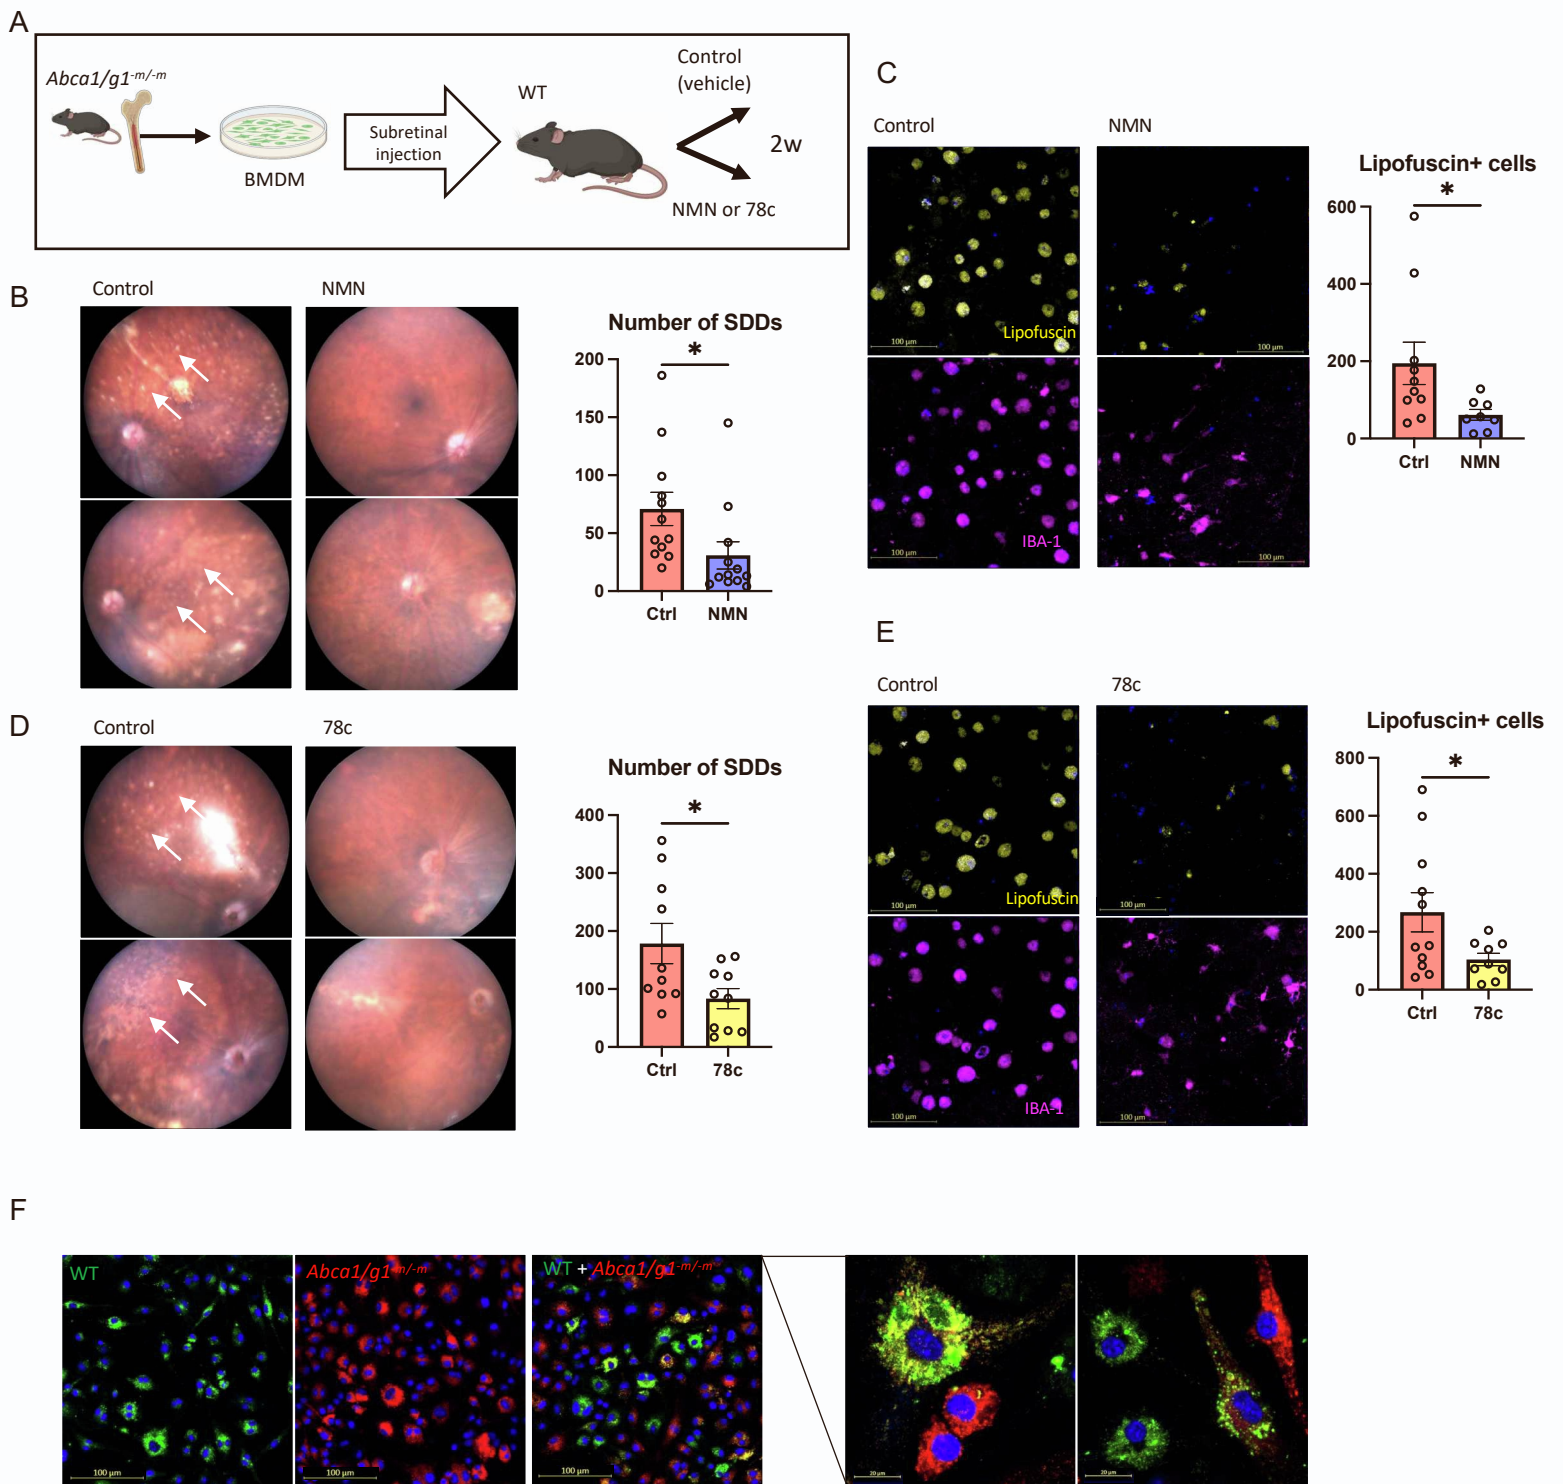

Figure S6. NAD<sup>+</sup> augmentation promotes the clearance of subretinal senescent macrophages and drusenoid deposits, related to Figure 6.

(A) Experimental design for SDD induction by subretinal injection of *Abca1/g1<sup>m/-m</sup>* BMDMs followed by treatment with NMN or CD38 inhibitor (78c). (B) Representative fundus images of eyes administered subretinal *Abca1/g1<sup>m/-m</sup>* BMDMs injection followed by the treatment with NMN and the quantification of SDD. (C) Representative images of RPE-flatmount showing lipofuscin- and IBA-1-positive cells and the quantification of lipofuscin-positive cells. (D) Representative fundus images of eyes treated with subretinal *Abca1/g1<sup>m/-m</sup>* BMDMs injection followed by the administration of 78c, and the quantification of SDD. (E) Representative images of RPE-flatmount showing lipofuscin- and IBA-1-positive cells and the quantification of lipofuscin-positive cells. (F) Co-incubation of *Abca1/g1<sup>m/-m</sup>* (red) BMDMs with young healthy BMDMs (green). \**p* < 0.05, t-test for comparison between 2 groups. Data are represented as mean ± SEM. The length of scale bar is indicated in each image.



Supplementary Table 1. qPCR probes, related to STAR methods

| Gene                                         | Taqman gene reference |
|----------------------------------------------|-----------------------|
| <i>β-actin</i>                               | Mm02619580_g1         |
| <i>Cdkn1a</i> ( <i>p21<sup>CIP1</sup></i> )  | Mm04205640_g1         |
| <i>Cdkn2a</i> ( <i>p16<sup>Ink4a</sup></i> ) | Mm00494449_m1         |
| <i>Cd38</i>                                  | Mm01220906_m1         |
| <i>Il-1β</i>                                 | Mm01336189_m1         |
| <i>Nampt</i>                                 | Mm01293559_m1         |
| <i>Nmnat1</i>                                | Mm01257929_m1         |
| <i>Nmnat3</i>                                | Mm00513791_m1         |
| <i>Tnf-α</i>                                 | Mm00443258_m1         |
| <i>Vcam1</i>                                 | Mm01320970_m1         |
| <i>Vegf-a</i>                                | Mm01281449_m1         |
